# Supplementary material
Source: publisher site journal article supplement (https://www.spandidos-publications.com/7518/downloadSupplementary)
Supplement: Supplementary file 1 [file downloadSupplementary]

## Sheet: Table SI
Table SI. α-Ketoglutarate-related gene list.
AMINO_ACID_BIOSYNTHETIC_PROCESS	MTOR_SIGNALING_PATHWAY	HIF-1a_SIGNALING_PATHWAY	CITRATE_CYCLE_TCA_CYCLE	AMINO_ACID_METABOLIC_PROCESS	GLUTATHIONE_METABOLISM	GLYCOLYSIS_GLUCONEOGENESIS	PYRUVATE_METABOLISM
AASDHPPT	AKT1	HK3	ACLY	AADAT	ANPEP	ACSS1	ACACA
AASS	AKT2	HKDC1	ACO1	AARS1	G6PD	ACSS2	ACACB
ABAT	AKT3	HIF1A	ACO2	AARS2	GCLC	ADH1A	ACAT1
ADI1	BRAF	IGF1R	CS	AARSD1	GCLM	ADH1B	ACAT2
AGXT	CAB39	IGF1	DLAT	AASDH	GGCT	ADH1C	ACOT12
AGXT2	CAB39L	INSR	DLD	AASDHPPT	GGT1	ADH4	ACSS1
ALDH18A1	DDIT4	INS	DLST	AASS	GGT5	ADH5	ACSS2
ALDH1A1	EIF4B	IFNGR1	FH	ABAT	GGT6	ADH6	ACYP1
APIP	EIF4E	IFNGR2	IDH1	ACAD8	GGT7	ADH7	ACYP2
ASL	EIF4E1B	IFNG	IDH2	ACADSB	GPX1	AKR1A1	AKR1B1
ASNS	EIF4E2	IL6R	IDH3A	ACAT1	GPX2	ALDH1A3	ALDH1B1
ASNSD1	EIF4EBP1	IL6	IDH3B	ACCS	GPX3	ALDH1B1	ALDH2
ASS1	HIF1A	LDHAL6A	IDH3G	ACCSL	GPX4	ALDH2	ALDH3A2
ATP2B4	IGF1	LDHAL6B	MDH1	ACMSD	GPX5	ALDH3A1	ALDH7A1
BCAT1	INS	LDHA	MDH2	ACY1	GPX6	ALDH3A2	ALDH9A1
BCAT2	MAPK1	LDHB	OGDH	ADHFE1	GPX7	ALDH3B1	DLAT
BHMT	MAPK3	LDHC	OGDHL	ADI1	GSR	ALDH3B2	DLD
BHMT2	MLST8	LTBR	PC	ADSS1	GSS	ALDH7A1	GLO1
CAD	MTOR	MTOR	PCK1	ADSS2	GSTA1	ALDH9A1	GRHPR
CBS	PDPK1	MAPK1	PCK2	AFMID	GSTA2	ALDOA	HAGH
CLN3	PGF	MAPK3	PDHA1	AGMAT	GSTA3	ALDOB	HAGHL
CPS1	PIK3CA	MAP2K1	PDHA2	AGXT	GSTA4	ALDOC	LDHA
CTH	PIK3CB	MAP2K2	PDHB	AGXT2	GSTA5	BPGM	LDHAL6A
DHFR	PIK3CD	NPPA	SDHA	ALDH18A1	GSTK1	DLAT	LDHAL6B
DHFR2	PIK3CG	NOS2	SDHB	ALDH1A1	GSTM1	DLD	LDHB
DHFRP1	PIK3R1	NOS3	SDHC	ALDH4A1	GSTM2	ENO1	LDHC
DPYD	PIK3R2	NFKB1	SDHD	ALDH5A1	GSTM3	ENO2	LDHD
ENOPH1	PIK3R3	PIK3CA	SUCLA2	ALDH6A1	GSTM4	ENO3	MDH1
ENSG00000274276	PIK3R5	PIK3CB	SUCLG1	ALDH8A1	GSTM5	FBP1	MDH2
GAD1	PRKAA1	PIK3CD	SUCLG2	AMDHD1	GSTO1	FBP2	ME1
GAD2	PRKAA2	PFKL	SUCLG2P2	AMT	GSTO2	G6PC1	ME2
GGT1	RHEB	PFKM		APIP	GSTP1	G6PC2	ME3
GLS	RICTOR	PFKP		ARG1	GSTT1	GALM	PC
GLS2	RPS6	PGK1		ARG2	GSTT2	GAPDH	PCK1
GLUD1	RPS6KA1	PGK2		ARHGAP11B	GSTZ1	GCK	PCK2
GLUD2	RPS6KA2	PIK3R1		ART4	IDH1	GPI	PDHA1
GLUL	RPS6KA3	PIK3R2		ASL	IDH2	HK1	PDHA2
GOT1	RPS6KA6	PIK3R3		ASNS	LAP3	HK2	PDHB
GOT1L1	RPS6KB1	PLCG1		ASNSD1	MGST1	HK3	PKLR
GOT2	RPS6KB2	PLCG2		ASPA	MGST2	LDHA	PKM
HAO1	RPTOR	PRKCA		ASPG	MGST3	LDHAL6A
ILVBL	STK11	PRKCB		ASRGL1	ODC1	LDHAL6B
LGSN	STRADA	PRKCG		ASS1	OPLAH	LDHB
MRI1	TSC1	PDHA1		ATCAY	PGD	LDHC
MTAP	TSC2	PDHA2		ATF4	RRM1	PCK1
MTHFD1	ULK1	PDHB		ATP2B4	RRM2	PCK2
MTHFD2L	ULK2	PDK1		ATP7A	RRM2B	PDHA1
MTHFR	ULK3	RPS6KB1		AUH	SMS	PDHA2
MTR	VEGFA	RPS6KB2		AZIN1	SRM	PDHB
MTRR	VEGFB	RPS6		AZIN2	TXNDC12	PFKL
NAGS	VEGFC	RBX1		BAAT		PFKM
NOXRED1	VEGFD	SERPINE1		BCAT1		PFKP
OAT		STAT3		BCAT2		PGAM1
OTC		SLC2A1		BCKDHA		PGAM2
PAH		TLR4		BCKDHB		PGAM4
PARK7		TFRC		BCKDK		PGK1
PCBD1		TF		BHMT		PGK2
PCBD2		VEGFA		BHMT2		PGM1
PHGDH		VHL		BLMH		PGM2
PLOD2				BPHL		PKLR
PLOD3				CAD		PKM
PSAT1				CARNMT1		TPI1
PSPH				CARNS1
PYCR1				CARS1
PYCR2				CARS2
PYCR3				CBS
SDS				CDO1
SDSL				CLN3
SEPHS1				CPS1
SEPHS2				CRYM
SERINC3				CSAD
SERINC5				CTH
SHMT1				CTNS
SHMT2				CTPS1
SLC1A3				CTPS2
SLC38A1				DALRD3
SRR				DAO
UPB1				DARS1
				DARS2
				DBT
				DCT
				DDAH1
				DDAH2
				DDC
				DDO
				DGLUCY
				DHFR
				DHFR2
				DHFRP1
				DIO1
				DLD
				DLST
				DPEP1
				DPYD
				EARS2
				ECHS1
				ENOPH1
				ENOSF1
				ENSG00000274276
				EPRS1
				ETFA
				ETFB
				FAH
				FARS2
				FARSA
				FARSB
				FN3K
				FPGS
				FTCD
				GAD1
				GAD2
				GARS1
				GART
				GATB
				GATC
				GCAT
				GCDH
				GCLC
				GCLM
				GCSH
				GFPT1
				GFPT2
				GGT1
				GGT5
				GLDC
				GLS
				GLS2
				GLUD1
				GLUD2
				GLUL
				GLYAT
				GLYATL1
				GLYATL1B
				GMPS
				GNMT
				GOT1
				GOT1L1
				GOT2
				GPT
				GPT2
				GSS
				GSTZ1
				HAAO
				HAL
				HAO1
				HARS1
				HARS2
				HDC
				HGD
				HIBADH
				HIBCH
				HMGCL
				HMGCLL1
				HNF4A
				HNMT
				HOGA1
				HPD
				HPDL
				HSD17B10
				HYKK
				IARS1
				IARS2
				ICMT
				IDO1
				IDO2
				IL4I1
				ILVBL
				INS
				IVD
				IYD
				KARS1
				KMO
				KYAT1
				KYAT3
				KYNU
				LARS1
				LARS2
				LGSN
				LRRC47
				MARS1
				MARS2
				MAT1A
				MCCC1
				MCCC2
				MECP2
				MIR21
				MMUT
				MPST
				MRI1
				MSRA
				MTAP
				MTHFD1
				MTHFD2L
				MTHFR
				MTHFS
				MTR
				MTRR
				NAGS
				NARS1
				NARS2
				NAT8L
				NDP
				NIT2
				NOS1
				NOS2
				NOS3
				NOX4
				NOXRED1
				NR1H4
				OAT
				OCA2
				ODC1
				OTC
				PAH
				PARK7
				PARS2
				PCBD1
				PCBD2
				PCCA
				PCCB
				PEPD
				PFAS
				PHGDH
				PIPOX
				PLOD2
				PLOD3
				PM20D1
				PPAT
				PRODH
				PRODH2
				PSAT1
				PSPH
				PTS
				PYCR1
				PYCR2
				PYCR3
				QARS1
				QDPR
				QRSL1
				RARS1
				RARS2
				RIDA
				RIMKLA
				RIMKLB
				SARDH
				SARS1
				SARS2
				SCLY
				SDS
				SDSL
				SEPHS1
				SEPHS2
				SERINC3
				SERINC5
				SHMT1
				SHMT2
				SIRT4
				SLC16A2
				SLC1A3
				SLC25A12
				SLC25A13
				SLC25A2
				SLC25A21
				SLC25A44
				SLC38A1
				SLC39A8
				SLC45A2
				SLC7A11
				SLC7A7
				SMS
				SRR
				TARS1
				TARS2
				TARS3
				TAT
				TDO2
				TH
				THAP4
				THNSL2
				TPH1
				TPH2
				TTC36
				TYR
				UCP2
				UPB1
				UROC1
				VARS1
				VARS2
				WARS1
				WARS2
				YARS1
				YARS2
